# Supplementary material
Source: PubMed Central journal article supplement (PMC3166549)
Supplement: NIHMS298283-supplement-Supp_Figure_S1.pdf [file NIHMS298283-supplement-Supp_Figure_S1.pdf]

## Supplemental Figure 1

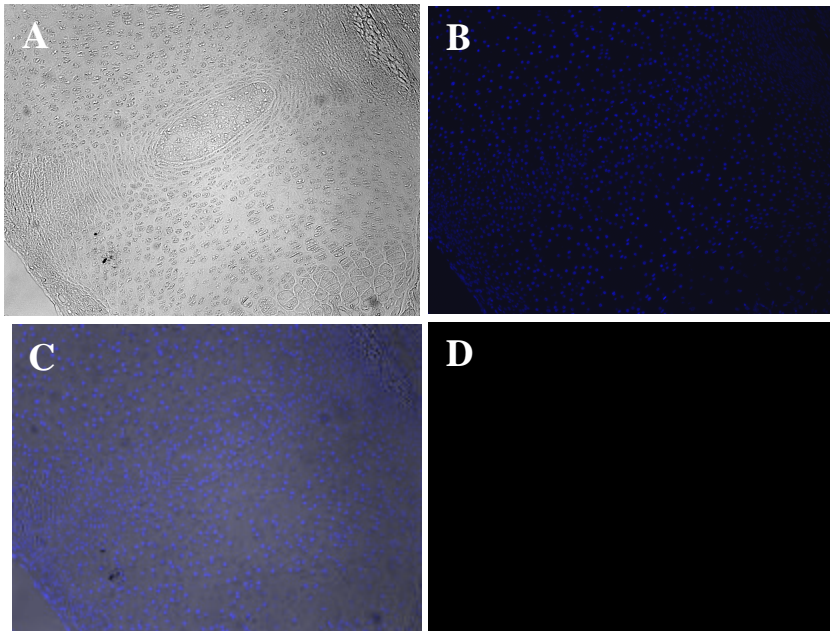

Negative control of immunofluorescent staining. A-D. Saggital sections of the intervertebral disc of an embryonic rat negative control (Mag. 20X). The same disc is shown in (A) brightfield imaging (B) DAPI (C) brightfield and DAPI merged (D) fluorescent.
