# Supplementary material
Source: PubMed Central journal article supplement (PMC3166549)
Supplement: NIHMS298283-supplement-Supp_Figure_S4.pdf [file NIHMS298283-supplement-Supp_Figure_S4.pdf]

## Supplemental Figure 4

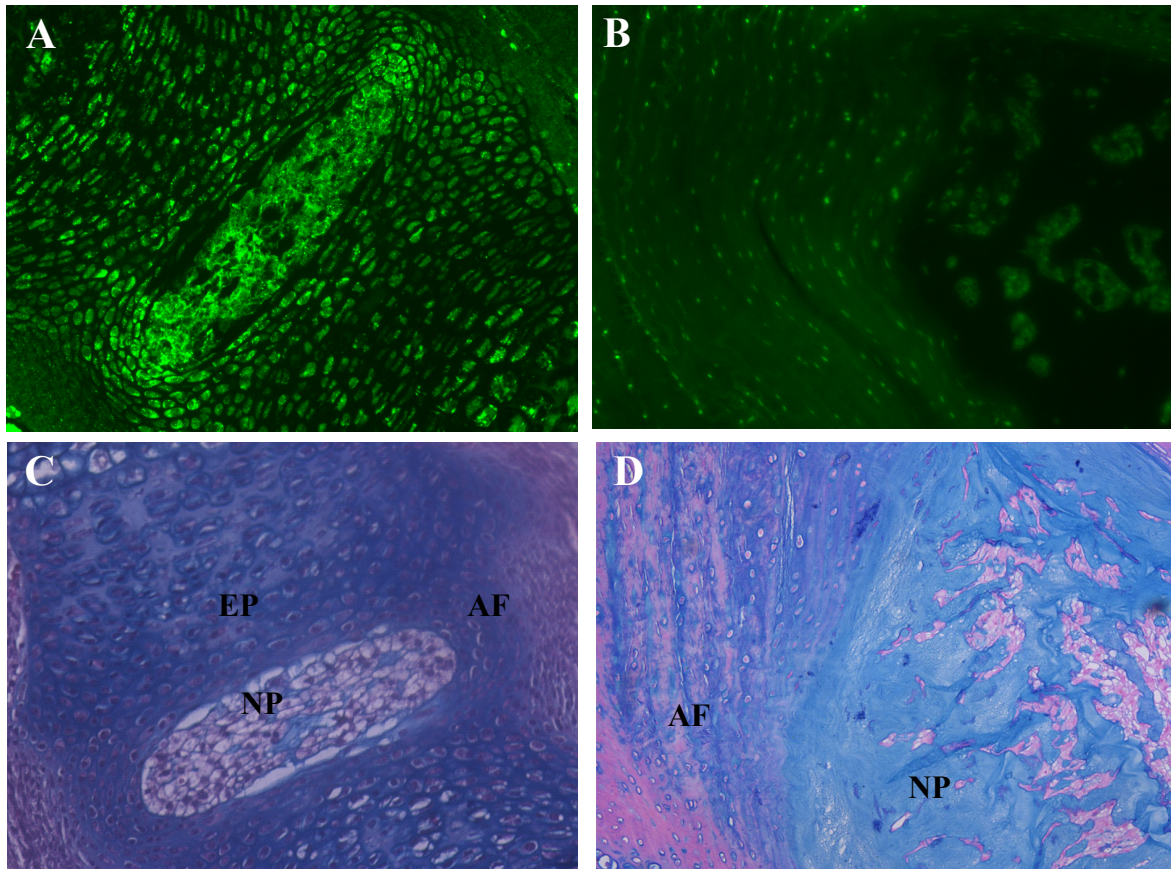

CCN3 expressed in the intervertebral disc is suppressed by TGF $\beta$ . A-D. Saggital sections of the intervertebral disc of embryonic (Mag. 20X) (A) and a skeletally mature rat (Mag. 10X) (B) treated with an anti-CCN3 antibody or counterstained with H&E and alcian blue (C, D). CCN3 is expressed in the nucleus pulposus (NP) and annulus fibrosus (AF) of both the neonatal and skeletally mature rat.
